# Supplementary material
Source: PubMed Central journal article supplement (PMC7984679)
Supplement: 15-01033.pdf [file 15-01033.pdf]

**On-line Table: Lesion counts for each patient using the 3 rating protocols discussed in this study**

| Case No. | Counts P1 | Counts P2 | Counts of Spatially Consistent Lesions in P1 and P2 | Counts P3 | Counts of Spatially Consistent Lesions in P1, P2, and P3 |
|----------|-----------|-----------|-----------------------------------------------------|-----------|----------------------------------------------------------|
| 1        | 53        | 47        | 40                                                  | 18        | 15                                                       |
| 2        | 21        | 17        | 14                                                  | 13        | 6                                                        |
| 3        | 7         | 6         | 5                                                   | 3         | 2                                                        |
| 4        | 5         | 4         | 4                                                   | 5         | 3                                                        |
| 5        | 6         | 3         | 2                                                   | 2         | 0                                                        |
| 6        | 16        | 20        | 11                                                  | 10        | 9                                                        |
| 7        | 19        | 18        | 16                                                  | 10        | 9                                                        |
| 8        | 11        | 10        | 8                                                   | 3         | 3                                                        |
| 9        | 163       | 171       | 143                                                 | 65        | 55                                                       |
| 10       | 2         | 2         | 0                                                   | 0         | 0                                                        |
| 11       | 1         | 1         | 1                                                   | 1         | 1                                                        |
| 12       | 5         | 8         | 4                                                   | 4         | 3                                                        |
| 13       | 6         | 10        | 5                                                   | 3         | 1                                                        |
| 14       | 14        | 8         | 6                                                   | 5         | 2                                                        |
| 15       | 8         | 8         | 4                                                   | 5         | 1                                                        |
| 16       | 0         | 0         | 0                                                   | 0         | 0                                                        |
| 17       | 41        | 46        | 32                                                  | 24        | 18                                                       |
| 18       | 4         | 2         | 1                                                   | 1         | 0                                                        |
| 19       | 30        | 19        | 14                                                  | 13        | 9                                                        |
| 20       | 18        | 19        | 13                                                  | 6         | 4                                                        |
| 21       | 7         | 4         | 5                                                   | 4         | 4                                                        |
| 22       | 4         | 5         | 4                                                   | 4         | 4                                                        |
| 23       | 7         | 7         | 5                                                   | 4         | 2                                                        |
| 24       | 4         | 7         | 3                                                   | 5         | 3                                                        |
| 25       | 120       | 102       | 91                                                  | 63        | 54                                                       |
| 26       | 70        | 84        | 51                                                  | 7         | 5                                                        |
| 27       | 0         | 2         | 0                                                   | 1         | 0                                                        |
| 28       | 1         | 3         | 1                                                   | 1         | 1                                                        |
| Total    | 643       | 633       | 483                                                 | 280       | 214                                                      |
| Mean     | 22.96     | 22.6      |                                                     | 10        |                                                          |
| Median   | 7         | 8         |                                                     | 4.5       |                                                          |
